# Supplementary material for: Cross-scale perspective on the Opalinus Clay: insights from the GeomInt2 project
Source: Copernicus journal article supplement (doi:10.5194/sand-2-105-2023), 2023-09-06

Supplement of Saf. Nucl. Waste Disposal, 2, 105–106, 2023  
<https://doi.org/10.5194/sand-2-105-2023-supplement>  
© Author(s) 2023. CC BY 4.0 License.

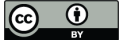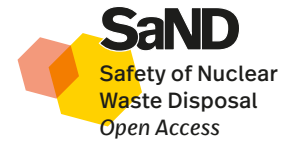

*Supplement of*

## **Cross-scale perspective on the Opalinus Clay: insights from the GeomInt2 project**

**Tuanny Cajuhi et al.**

*Correspondence to:* Tuanny Cajuhi ([tuanny.cajuhi@bgr.de](mailto:tuanny.cajuhi@bgr.de))

The copyright of individual parts of the supplement might differ from the article licence.

# Cross-scale perspective on the Opalinus Clay: Insights from the GeomInt2 project

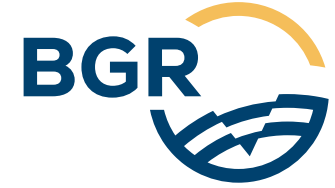

Tuanny Cajuhi<sup>1</sup>, Jobst Maßmann<sup>1</sup>, Gesa Ziefle<sup>1</sup>, Thomas Nagel<sup>2</sup> and Keita Yoshioka<sup>3</sup>

- *Interacting* points for interpreting and modeling complex systems: abstract and practical steps.
  - 💡 *Abstract* points covering (numerical) modeling methodology.
  - *Concrete* discussion on formation of drying cracks monitored in the Cyclic Deformation (CD-A) Experiment in Mont Terri.

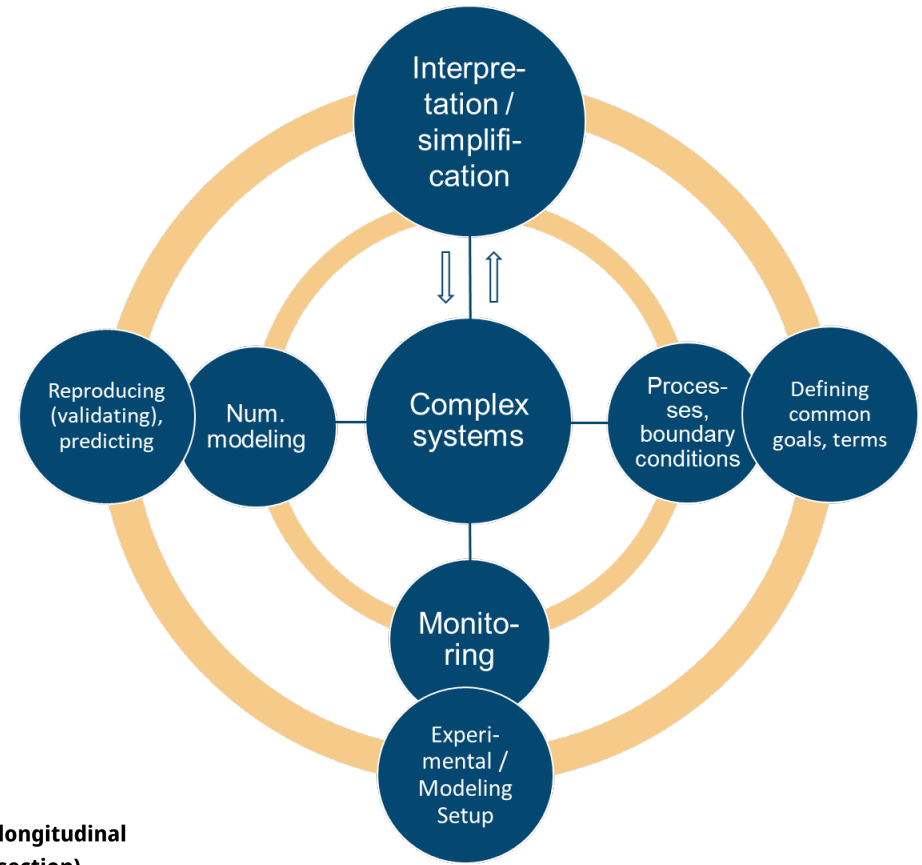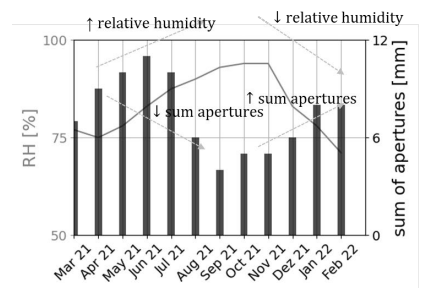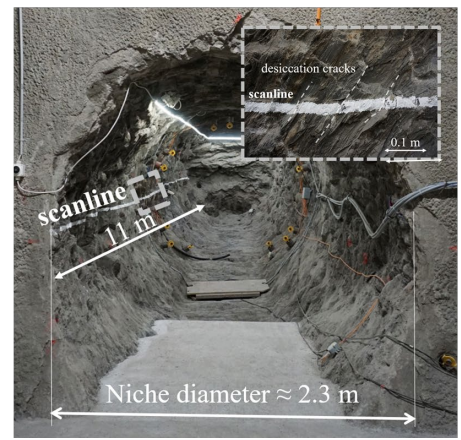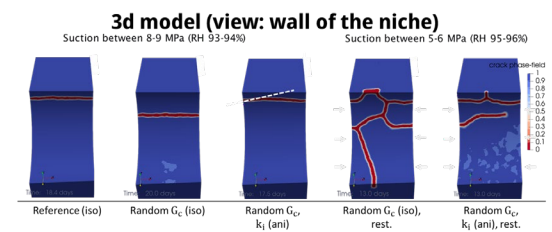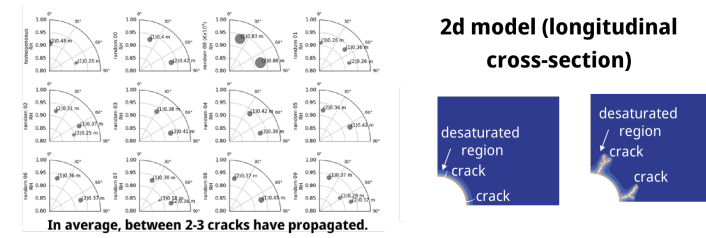

Supplement: Supplementary file 1 [file sand-2-105-2023-supplement.pdf]
